# Supplementary material
Source: PubMed Central journal article supplement (PMC2630093)
Supplement: 0808383106_0808383106SI.pdf [file 0808383106_0808383106SI.pdf]

# Supporting Information

Ishiwata *et al.* 10.1073/pnas.0808383106

## SI Text

**Elimination of Toxic PolyQ Amyloid by Gpg1.** Propagation of polyQ nonprion amyloids was also examined by using a yeast-based assay for polyQ toxicity developed by Sherman and colleagues (1). Because it is known that toxicity of polyQ is seen only in the presence of [*PSI*<sup>+</sup>] or [*PIN*<sup>+</sup>] prion (1, 2), over-expression of Gpg1 is likely to hamper polyQ toxicity in [*PIN*<sup>+</sup>] cells. We expressed a GFP-tagged polypeptide derived from mutant (103Q) form of huntingtin under the galactose-inducible *GAL1* promoter in [*PIN*<sup>+</sup>] cells (NPK562). As expected, expression of 103Q on galactose plates was toxic to yeast, whereas the same cells grew normally on glucose plates (Fig. S1A). When Gpg1 was over-expressed from pGPG1, 103Q-induced toxicity was completely blocked (see Fig. S1A). Under these conditions, 103Q-GFP formed aggregates with strong fluorescence foci in the absence of pGPG1, whereas 103Q-GFP appeared diffusely distributed in the cytoplasm in the presence of pGPG1 (Fig. S1B). These findings confirm that Gpg1 hampers toxic polyQ aggregates in [*PIN*<sup>+</sup>] cells, as expected.

**Methods. Strains and manipulations.** Elimination of [*PSI*<sup>+</sup>], [*URE3*], or [*PIN*<sup>+</sup>] prion by Gpg1 was examined by transforming cells with plasmid pGPG1 expressing Gpg1 from the strong constitutive *GPD* promoter: the relevant prion phenotype of transformants was monitored by colony color based on the expression of the *ade1-14* allele or the *DAL5-ADE2* fusion, and by formation of Rnq1-GFP fluorescent foci and SDS-stable Rnq1 polymers, respectively, as described previously (3). To monitor colony color based on the *ade1-14* nonsense suppression or transcrip-

tional (de)repression of *ADE2* expression, yeast cells were grown on YPD plates for 4 days at 30 °C. The null *gpg1Δ* strain was constructed by transformation of NPK265 strain with a PCR product amplified from the *gpg1::KanMX* DNA (American Type Culture Collection strain no. 14488) by using primers ≈100-bp upstream and downstream of the *GPG1* coding sequence (5'-CACTCAATTTCAACGAGG-3' and 5'-CCCATTTGCCAC-CAGCG-3'). Transformation was performed as described previously (3).

**Plasmids.** The original plasmid pN5 and its *Sau3AI*-*BamHI* deletion derivative pN5-1 (Fig. 1A) are derivatives of pRS423 (*HIS3* marker). The 378-bp coding sequence of *GPG1* was amplified by PCR using primers 5'-TTTGGATCCAATGTTT-TATCTAAGTGAC-3' and 5'-TTTCTCGAGCTAGTGATA-GAACCTTCTC-3', and cloned into expression plasmids pRS413GPDp (*HIS3* marker) and pRS414GPDp (*TRP1* marker), giving rise to Gpg1-expression plasmid pGPG1 marked with *HIS3* or *TRP1*. The Rnq1-GFP expression plasmid, pRS414CUP1p-Rnq1-GFP, and the polyQ-toxicity assay plasmid are described previously (1, 3). Hsp104-expression plasmid pHSP104 was constructed by cloning PCR-amplified *HSP104* coding sequence (primers: 5'-GGGGGATCCATATGAAC-GACCAAACGCAATT-3' and 5'-GGGGCTCGAGTTATAT-TACTGATTCTTGTTTCGAA-3') into expression plasmids pRS423GPDp (*HIS3* marker) and pRS425GPDp (*LEU2* marker). The YFP reporter fusion to Sup35NM domain, pRS413CUP1p-NM-YFP, was described previously (3). The CFP reporter fusion to Gpg1, pRS424CUP1p-Gpg1-CFP, was constructed as described previously except that a peptide linker, GGGSGGGSG, was inserted at the junction (3).

1. Meriin AB, *et al.* (2002) Huntington toxicity in yeast model depends on polyglutamine aggregation mediated by a prion-like protein Rnq1. *J Cell Biol* 157:997–1004.
2. Gokhale KC, Newnam GP, Sherman MY, Chernoff YO (2005) Modulation of prion-dependent polyglutamine aggregation and toxicity by chaperone proteins in the yeast model. *J Biol Chem* 280:22809–22818.
3. Kurahashi H, Ishiwata M, Shibata S, Nakamura Y (2008) A regulatory role of the Rnq1 nonprion domain for prion propagation and polyglutamine aggregates. *Mol Cell Biol* 28:3313–3323.
4. Bailleul PA, Newnam GP, Steenbergen JN, Chernoff YO (1999) Genetic study of interactions between the cytoskeletal assembly protein Slal and prion-forming domain of the release factor Sup35 (eRF3) in *Saccharomyces cerevisiae*. *Genetics* 153:81–94.
5. Brachmann A, Baxa U, Wickner RB (2005) Prion generation *in vitro*: Amyloid of Ure2p is infectious. *EMBO J* 24:3082–3092.
6. Kurahashi H, Nakamura Y (2007) Channel mutations in Hsp104 hexamer distinctively affect thermotolerance and prion-specific propagation. *Mol Microbiol* 63:1669–1683.
7. Brachmann CB, *et al.* (1998) Designer deletion strains derived from *Saccharomyces cerevisiae* S288C: A useful set of strains and plasmids for PCR-mediated gene disruption and other applications. *Yeast* 14:115–132.

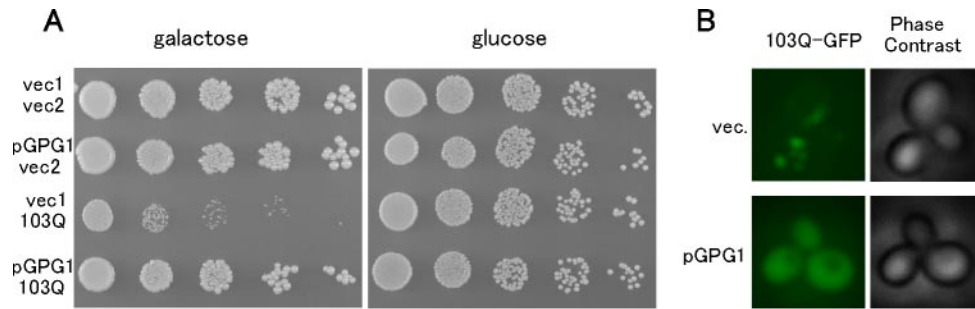

**Fig. S1.** Effect of Gpg1 over-expression on polyQ aggregation and toxicity. (A) 103Q-induced toxicity and the blockage of this toxicity by Gpg1 in [*PIN*<sup>+</sup>] strains. Mid-log phase cultures of [*PIN*<sup>+</sup>] cells (NPK562) carrying the indicated sets of plasmids were serially diluted 5-fold and spotted on SC (glucose) (*Right*) and SGal (galactose) (*Left*) plates and then grown for 3 days (*Right*) or 6 days (*Left*), respectively. Plasmids: vec1, empty vector pRS413; pGPG1, pRS413GPDp derivative expressing Gpg1; vec2, empty vector pYES2; 103Q, pYES2 derivative expressing 103Q from the *GAL1* promoter. (B) 103Q-GFP aggregates monitored by fluorescent microscopy. The [*PIN*<sup>+</sup>] strain (NPK562) carrying the 103Q-GFP plasmid was transformed with the empty plasmid pRS413 (vec.) and with pGPG1. The resulting double transformants were grown in SC broth and mid-log phase cultures were transferred to SGal liquid medium for 6 h. Phase contrast (*Right*) and fluorescent (*Left*) images of 103Q-GFP are shown.

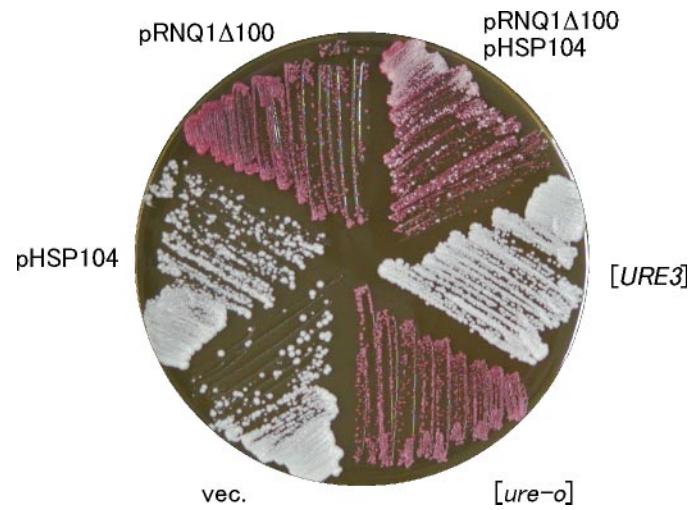

**Fig. 52.** Compensatory effect of over-expressing Hsp104 on Rnq1 $\Delta$ 100-induced prion elimination. NPK435 ([*URE3*] [*PIN*<sup>+</sup>]) strain was transformed with pHSP104 and/or pRNQ1 $\Delta$ 100 (pRS415 derivative carrying *rnq1* $\Delta$ 100; constructed in the present study), and transformants were selected on SC-his-leu after 3 days and regrown on YPD for 4 days to monitor colony color as shown in Fig. 3C.

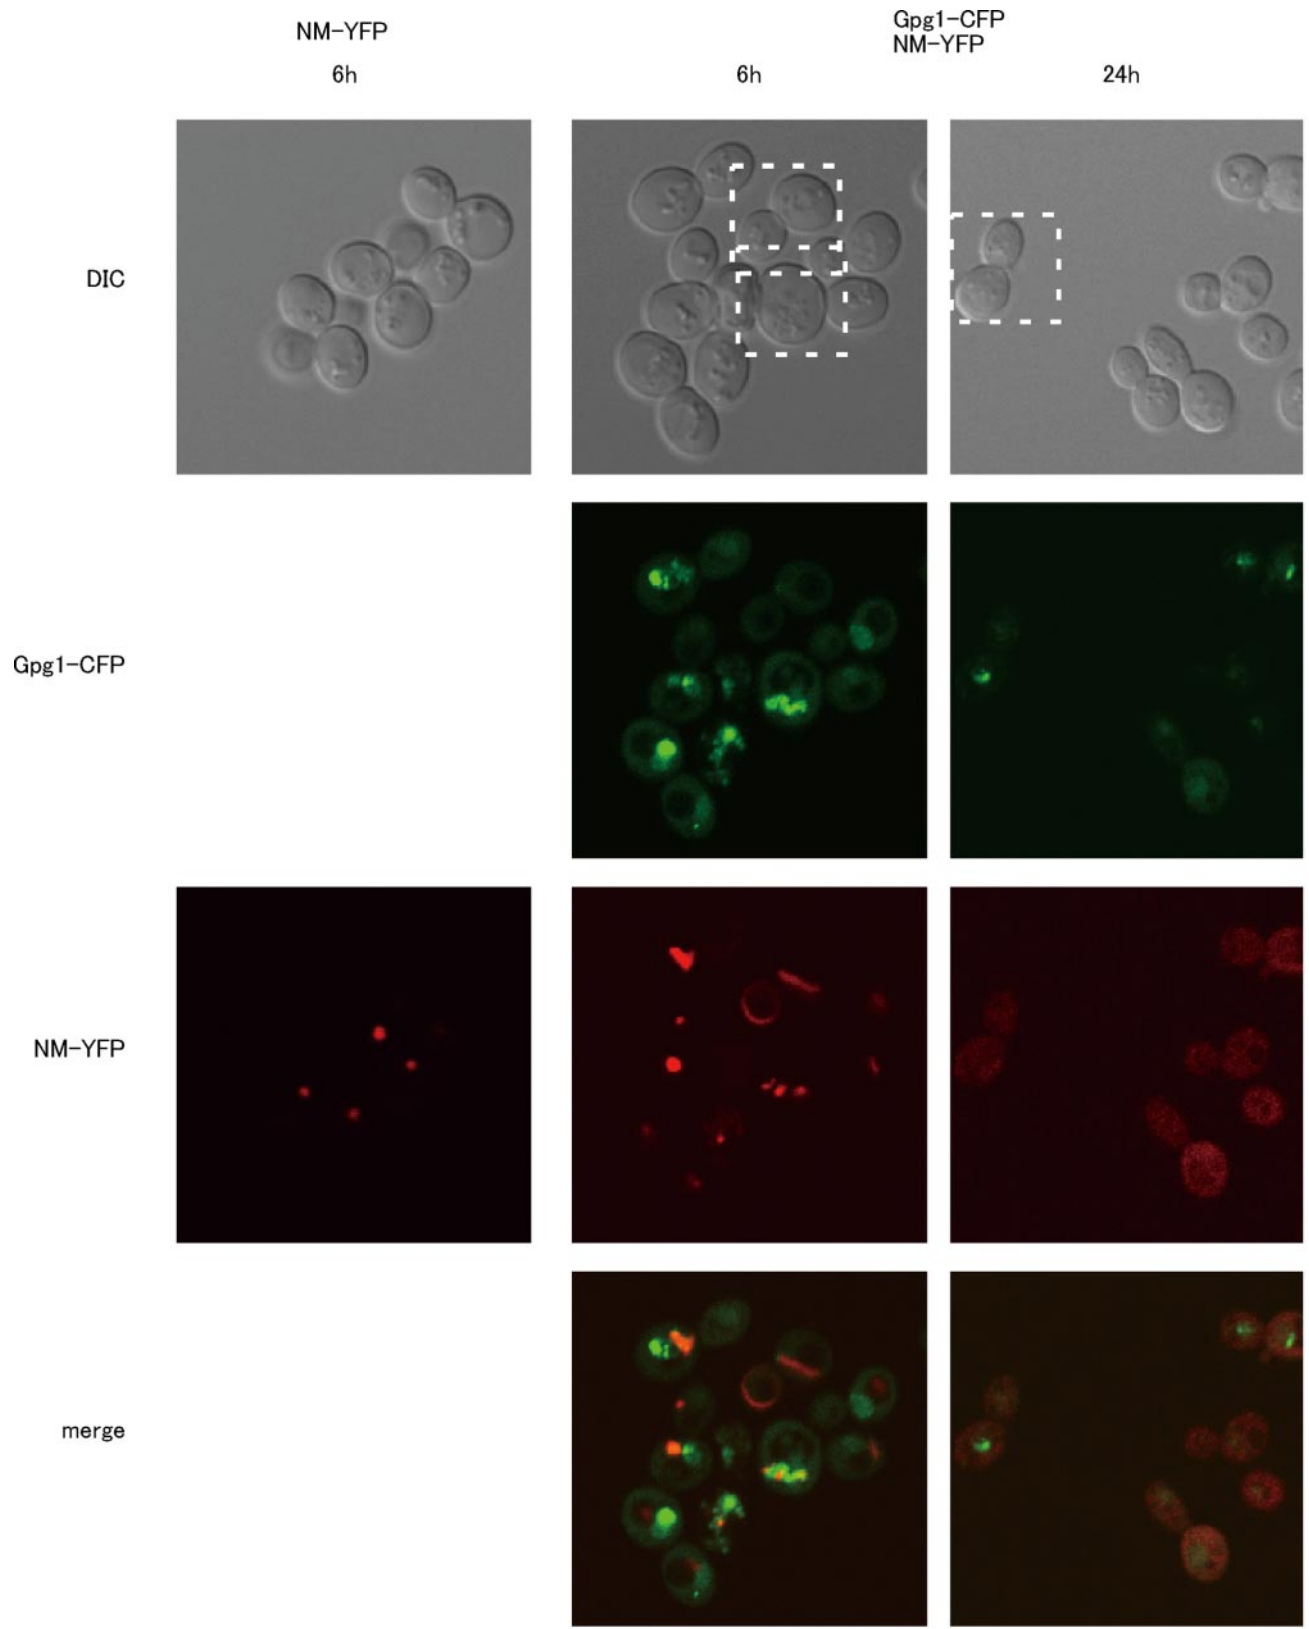

**Fig. S3.** Wider field image of confocal fluorescence microscopy of Sup35NM-YFP and Gpg1-CFP expressed in  $[PSI^+]$  strain (NPK265). Experimental procedures and condition are the same as in Fig. 4C, except that an NM-YFP single expression image is shown (*Left*). Boxed areas are shown in Fig. 4C.

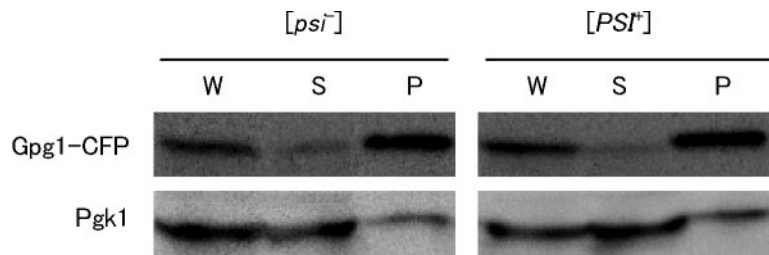

**Fig. S4.** Pelletable aggregation of Gpg1-CFP. Gpg1-CFP was expressed in NPK265 ([PSI<sup>+</sup>]) and NPK564 ([psi<sup>-</sup>]) cells as shown in Fig. 4C, and cell lysates were fractionated by centrifugation and analyzed by SDS/PAGE and Western blotting, as shown in Fig. 4A.

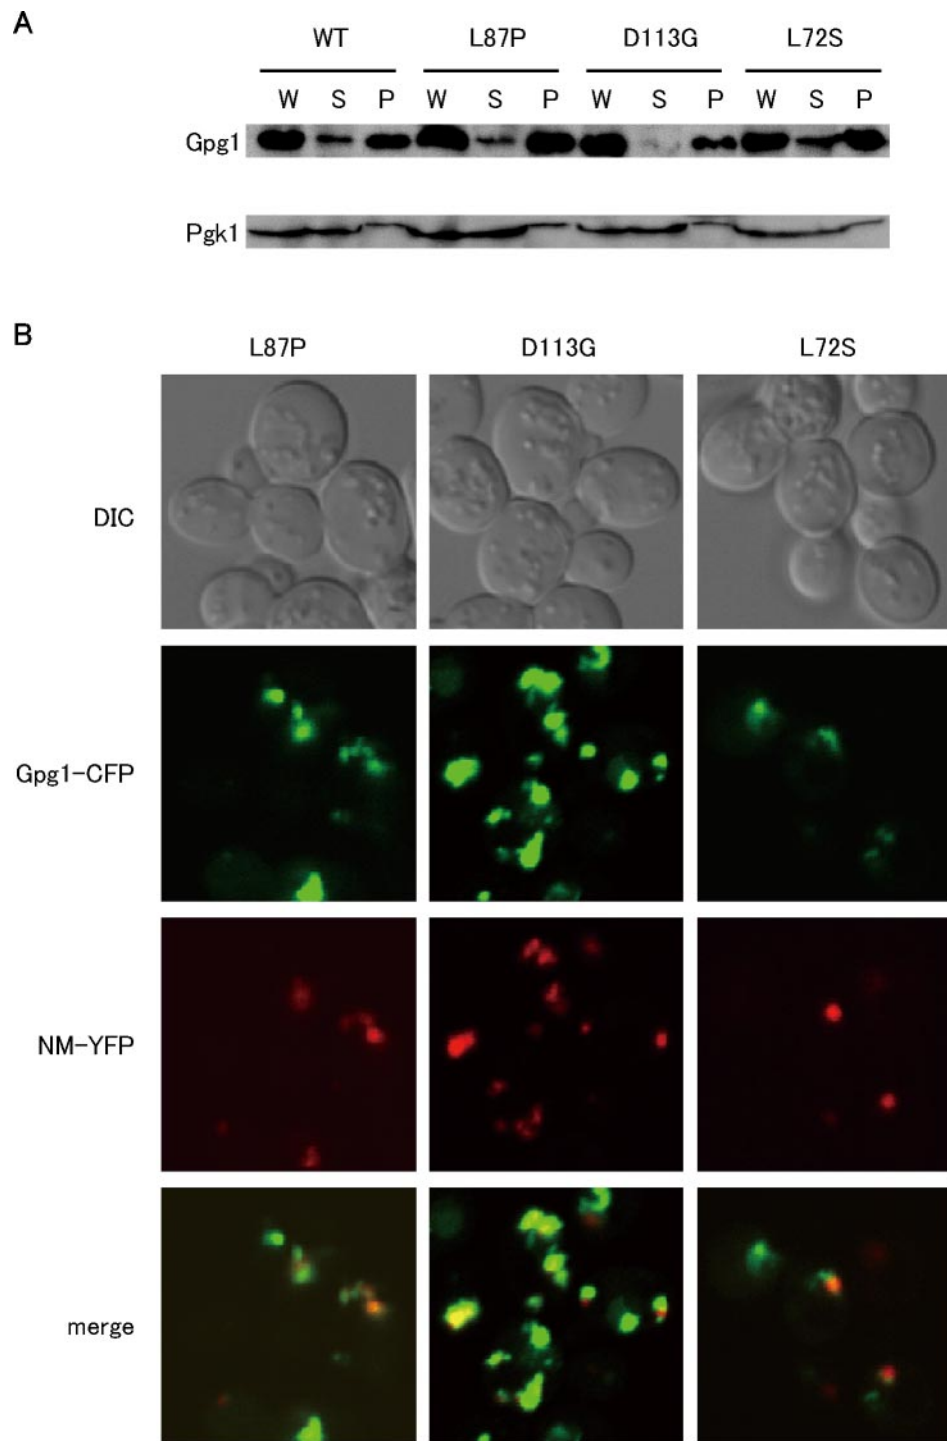

**Fig. S5.** Biochemical and morphological study of *gpg1* mutant aggregates. (A) Wild-type and mutant (L72S, L87P, and D113G) Gpg1s were expressed from pGPG1 plasmids carrying wild-type and *gpg1* mutations in NPK564 ( $[psi^-]$ ), as shown in Fig. 5C, and each protein aggregation was monitored by centrifugation assay, as shown in Fig. 4A. (B) Confocal fluorescence microscopy of Sup35NM-YFP and mutant Gpg1-CFP coexpressed for 6 h in  $[PSI^+]$  strain (NPK265). Experimental procedures and condition are the same as in Fig. 4C.

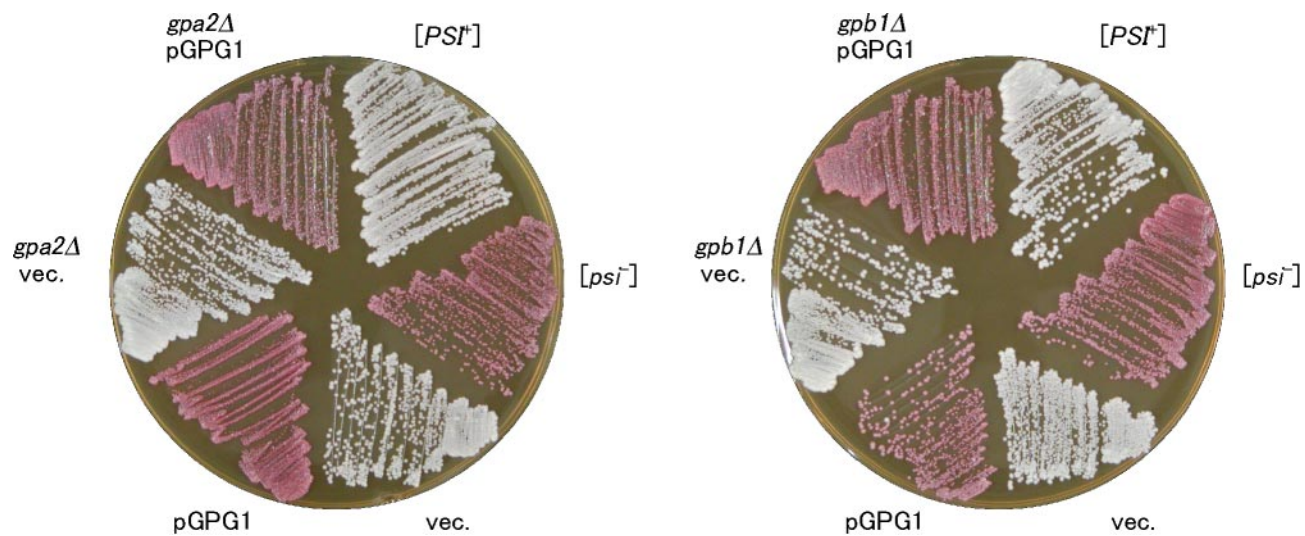

**Fig. S6.** Prion elimination by Gpg1 over-expression in G-protein  $\alpha$  and  $\beta$  subunit deletion strains. NPK265 ([PSI<sup>+</sup>] *ade1-14*) strain carrying *gpa2Δ* (Left) or *gpb1Δ* (Right) chromosomal allele (nullified by *KanMX*; present study) was transformed with an empty vector (vec.) or pGPG1. Transformants were selected on SC-his after 3 days and regrown on YPD for 4 days to monitor colony color. [PSI<sup>+</sup>] and [psi<sup>-</sup>] control cells are also shown.

Table S1. Summary of defects of *gpg1* mutants in prion elimination

| <i>gpg1</i> alleles | Prion elimination activity  |                             |                 |
|---------------------|-----------------------------|-----------------------------|-----------------|
|                     | [ <i>PSI</i> <sup>+</sup> ] | [ <i>PIN</i> <sup>+</sup> ] | [ <i>URE3</i> ] |
| Wild type           | +                           | +                           | +               |
| L34H                | –*                          | –                           | –*              |
| L34P                | ±                           | –                           | –*              |
| V38D                | –*                          | –                           | –*              |
| L44P                | –                           | –                           | –*              |
| D46Y                | ±                           | –                           | ±               |
| L65P                | –*                          | –                           | –*              |
| L69S                | –*                          | –                           | –*              |
| L72S                | ±                           | –                           | –*              |
| L87P                | –                           | –                           | –*              |
| K90E                | –                           | –                           | –*              |
| R111G               | ±                           | –                           | –*              |
| D113G               | –*                          | –                           | –*              |
| R121W               | –*                          | –                           | –*              |
| R122S               | ±                           | –                           | –*              |

The data in Fig. 5 and analogous not-shown data are summarized together. Symbols representing the activity: +, strong elimination; ±, weak (or partial) elimination; –\*, subtle (or nearly no) elimination; –, no elimination.



Table S2. Strains

| Laboratory name | Plasmotype                                                         | Genotype                                                               | Source or origin, ref.    |
|-----------------|--------------------------------------------------------------------|------------------------------------------------------------------------|---------------------------|
| NPK50           | strong [ <i>PSI</i> <sup>+</sup> ],<br>[ <i>pin</i> <sup>-</sup> ] | <i>MATa ade1-14 leu2-3,112<br/>ura3-52 his3Δ200 trp1-289</i>           | 74-D694                   |
| NPK197          | weak [ <i>PSI</i> <sup>+</sup> ],<br>[ <i>pin</i> <sup>-</sup> ]   | <i>MATa ade1-14 leu2Δ0 ura3-197<br/>his3Δ200 trp1-289</i>              | Present study             |
| NPK200          | [ <i>psi</i> <sup>-</sup> ], [ <i>PIN</i> <sup>+</sup> ]           | <i>MATa ade1-14 leu2-3,112 ura3-52<br/>his3Δ200 trp1-289</i>           | OT60 (4)                  |
| NPK265          | strong [ <i>PSI</i> <sup>+</sup> ],<br>[ <i>PIN</i> <sup>+</sup> ] | <i>MATa ade1-14 leu2Δ0 ura3-197<br/>his3Δ200 trp1-289</i>              | Present study             |
| NPK302          | [ <i>URE3</i> ], [ <i>pin</i> <sup>-</sup> ]                       | <i>MATa PD-ADE2 his3 leu2 trp1<br/>kar1 PD-CAN1</i>                    | BY242 [ <i>URE3</i> ] (5) |
| NPK304          | [ <i>URE3</i> ], [ <i>PIN</i> <sup>+</sup> ]                       | <i>MATα PD-ADE2 leu2 trp1 ura3<br/>kar1 PD-CAN1</i>                    | BY319 [ <i>URE3</i> ] (5) |
| NPK339          | [ <i>psi</i> <sup>-</sup> ], [ <i>pin</i> <sup>-</sup> ]           | <i>MATa ade1-14 leu2Δ0 ura3-197<br/>his3Δ200 trp1-289 hsp104::LEU2</i> | (6)                       |
| NPK435          | [ <i>URE3</i> ], [ <i>PIN</i> <sup>+</sup> ]                       | <i>MATa PD-ADE2 his3 leu2 trp1<br/>kar1 PD-CAN1</i>                    | (3)                       |
| NPK562          | [ <i>psi</i> <sup>-</sup> ], [ <i>PIN</i> <sup>+</sup> ]           | <i>MATα leu2Δ0 ura3Δ0 his3Δ200<br/>trp1Δ63 lys2Δ0 met15Δ0</i>          | BY4727 (7)                |
| NPK563          | strong [ <i>PSI</i> <sup>+</sup> ],<br>[ <i>PIN</i> <sup>+</sup> ] | <i>MATa ade1-14 leu2Δ0 ura3-197<br/>his3Δ200 trp1-289 gpg1::KanMX</i>  | Present study             |
| NPK564          | [ <i>psi</i> <sup>-</sup> ], [ <i>pin</i> <sup>-</sup> ]           | Same as NPK265: Prions were cured by GuHCl treatment                   | Present study             |
